# Supplementary material
Source: HighWire-hosted journal article supplement (https://jmg.bmj.com/content/59/4/328)

Supplementary figure 1a: CRC samples tested

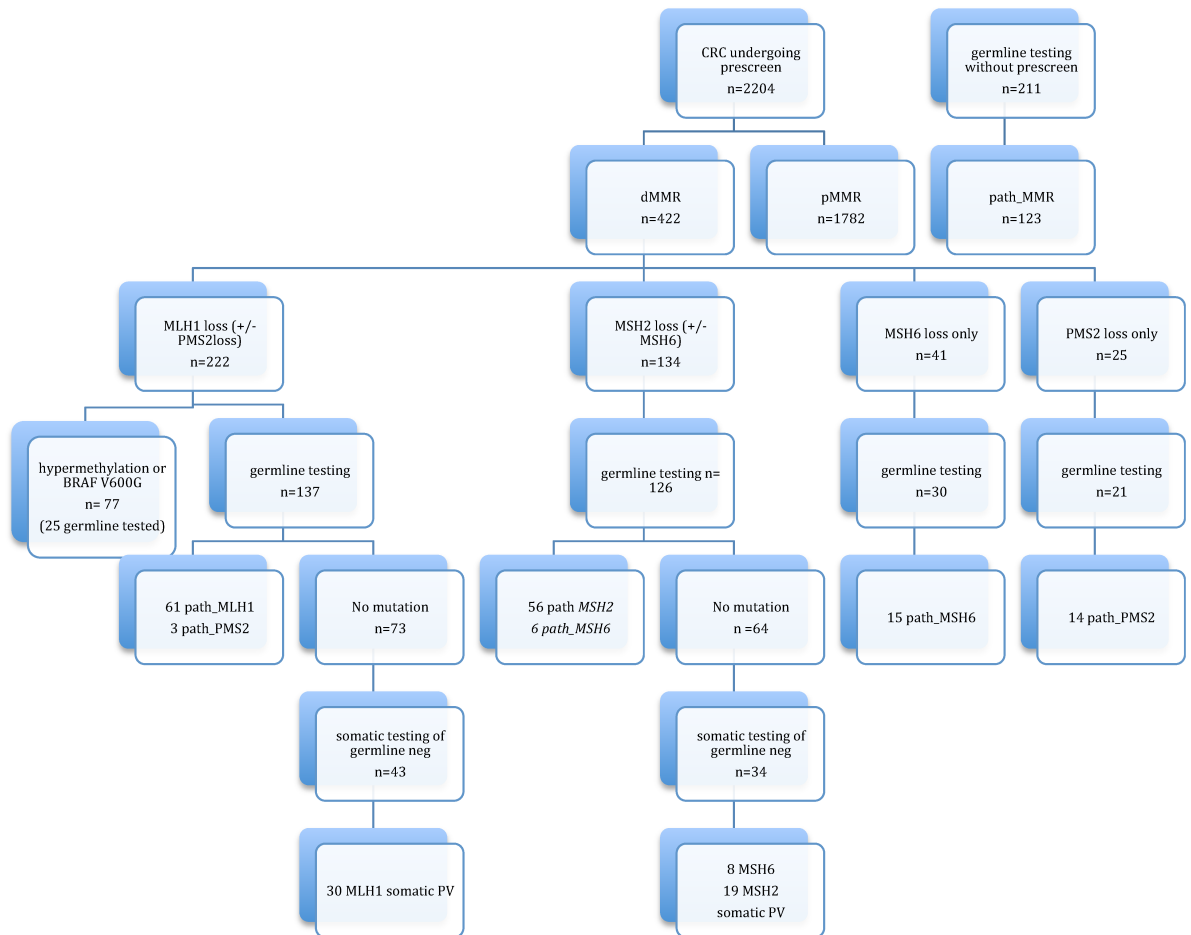

Supplement: inline-supplementary-material-1 [file inline-supplementary-material-1.pdf]
